# Supplementary material for: The Effect of the Particle Size Reduction on the Biorelevant Solubility and Dissolution of Poorly Soluble Drugs with Different Acid-Base Character
Source: MDPI journal article supplement (doi:10.3390/pharmaceutics15010278), 2023-01-13
Supplement: s1 [file s1]

# Supplementary Materials: The Effect of the Particle Size Reduction on the Biorelevant Solubility and Dissolution of Poorly Soluble Drugs with Different Acid-Base Character

Dóra Csicsák <sup>1</sup>, Rita Szolláth <sup>1</sup>, Szabina Kádár <sup>2</sup>, Rita Ambrus <sup>3</sup>, Csilla Bartos <sup>3</sup>, Emese Balogh <sup>4</sup>, István Antal <sup>4</sup>, István Köteles <sup>1</sup>, Petra Tózsér <sup>2</sup>, Vivien Bárdos <sup>1</sup>, Péter Horváth <sup>1</sup>, Enikő Borbás <sup>2</sup>, Krisztina Takács-Novák <sup>1</sup>, Bálint Sinkó <sup>5</sup> and Gergely Völgyi <sup>1,\*</sup>

<sup>1</sup> Department of Pharmaceutical Chemistry, Semmelweis University, 9 Hőgyes Endre Street, 1092 Budapest, Hungary

<sup>2</sup> Department of Organic Chemistry and Technology, Faculty of Chemical Technology and Biotechnology, Budapest University of Technology and Economics, 3 Műegyetem Rkp., 1111 Budapest, Hungary

<sup>3</sup> Institute of Pharmaceutical Technology and Regulatory Affairs, University of Szeged, 6 Eötvös Street, 6720 Szeged, Hungary

<sup>4</sup> Department of Pharmaceutics, Semmelweis University, 7 Hőgyes Endre Street, 1092 Budapest, Hungary

<sup>5</sup> Pion Inc., 10 Cook Street, Billerica, MA 01821, USA

\* Correspondence: volgyi.gergely@pharma.semmelweis-univ.hu

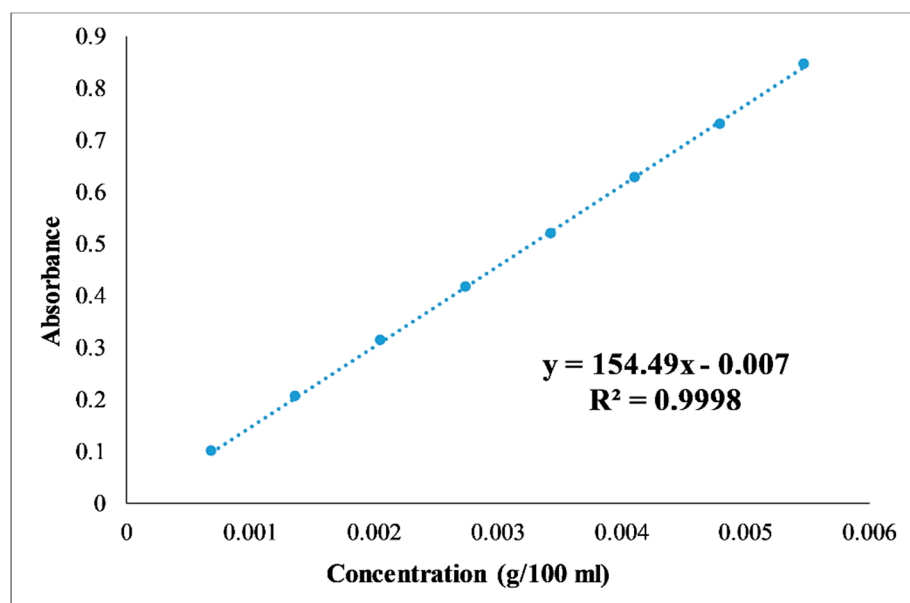

Figure S1: Calibration curve of furosemide for the calculation of the specific absorbance in FaSSIF blank media

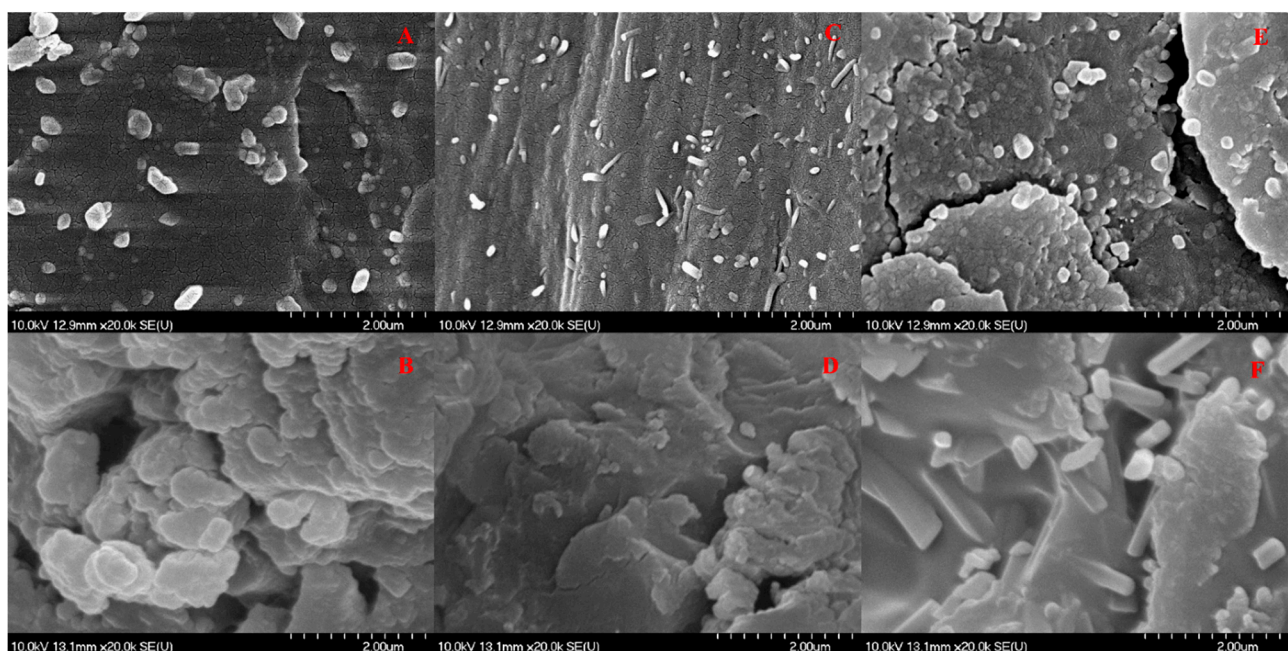

**Figure S2.** SEM images of papaverine hydrochloride nanonized with PVPK (A) and PVA (B); furosemide nanonized with PVPK (C) and PVA (D); niflumic acid nanonized with PVPK (E) and PVA (F)

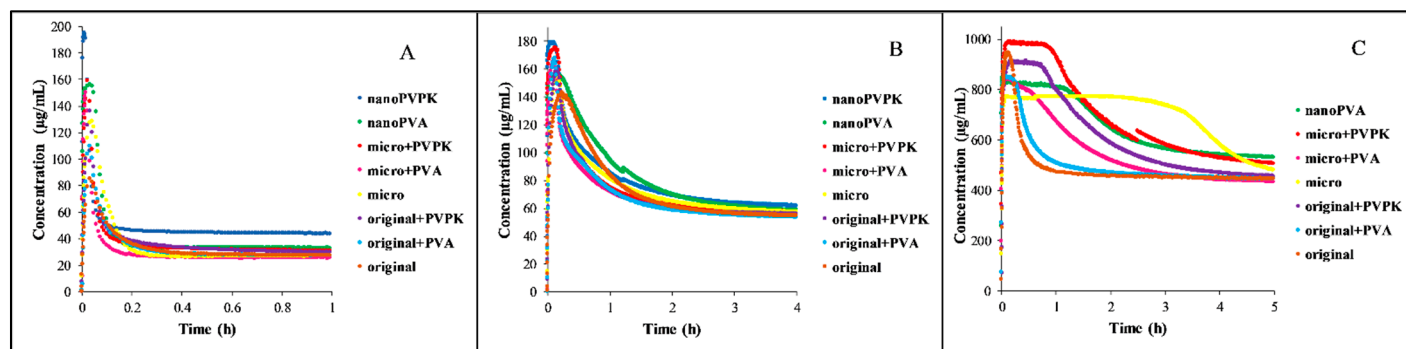

**Figure S3.** Dissolution profile of papaverine hydrochloride in FaSSIF blank (A), FaSSIF full (B) and FeSSIF blank (C) medium, the time on the x axis is adjusted to the time of precipitation

**Table S1.** Mean particle size of the nanonized compounds.

|           | A     | B     | C     | D     | E     | F     |
|-----------|-------|-------|-------|-------|-------|-------|
| Mean (nm) | 288.3 | 225.4 | 305.8 | 229.8 | 212.2 | 743.3 |
| SD±       | 116.1 | 96.9  | 104.7 | 67.3  | 47.2  | 720.9 |
